# Supplementary material for: Biogeographical Patterns and Assembly of Bacterial Communities in Saline Soils of Northeast China
Source: MDPI journal article supplement (doi:10.3390/microorganisms10091787), 2022-09-05
Supplement: s1 [file s1]

## **Supplementary Information**

Biogeographical patterns and assembly of bacterial communities in saline soils of Northeast China

Xiaolong Liang<sup>1#</sup>, Xiaoyu Wang<sup>2#</sup>, Ning Zhang<sup>3\*</sup>, Bingxue Li<sup>2\*</sup>

<sup>1</sup> Key Laboratory of Pollution Ecology and Environmental Engineering, Institute of Applied Ecology, Chinese Academy of Sciences, Shenyang 110016, China

<sup>2</sup> College of Land and Environment, Shenyang Agricultural University, Shenyang 110866, China

<sup>3</sup> College of Bioscience and Biotechnology, Shenyang Agricultural University, Shenyang 110866, China

# The authors contributed equally to this study.

\* Correspondence: zhangning@syau.edu.cn; libingxue@syau.edu.cn.

**Table S1.** The geographic locations of the collected soil samples in Northeast China along a south-north latitudinal gradient (40°53' N to 47°26' N).

| Sample | Altitude | Latitude (N) | Longitude (E) | pH    |
|--------|----------|--------------|---------------|-------|
| N47A   | 149.55m  | 47°25'49"    | 123°35'24"    | 9.21  |
| N47B   | 150.48m  | 47°26'24"    | 123°35'55"    | 9.22  |
| N47C   | 148.93m  | 47°26'45"    | 123°36'34"    | 8.94  |
| N46A   | 133.15m  | 46°05'35"    | 123°15'44"    | 8.5   |
| N46B   | 132.03m  | 46°05'11"    | 123°15'22"    | 8.8   |
| N46C   | 133.97m  | 46°04'49"    | 123°15'42"    | 8.62  |
| N45A   | 127.27m  | 45°43'58"    | 124°45'57"    | 10.45 |
| N45B   | 128.01m  | 45°44'15"    | 124°46'18"    | 10.43 |
| N45C   | 127.36m  | 45°44'20"    | 124°46'29"    | 10.44 |
| N44A   | 140.16m  | 44°30'24"    | 123°08'09"    | 10.24 |
| N44B   | 141.06m  | 44°30'33"    | 123°08'19"    | 10.35 |
| N44C   | 139.38m  | 44°31'39"    | 123°08'58"    | 10.37 |
| N42A   | 251.28m  | 42°47'34"    | 122°26'32"    | 8.4   |
| N42B   | 250.64m  | 42°49'53"    | 122°24'38"    | 8.35  |
| N42C   | 249.28m  | 42°49'50"    | 122°24'55"    | 8.39  |
| N40A   | 20.09m   | 40°53'49"    | 121°50'02"    | 8.13  |
| N40B   | 20.33m   | 40°53'30"    | 121°49'51"    | 8.19  |
| N40C   | 20.49m   | 40°53'21"    | 121°49'39"    | 8.16  |

Note: Soil samples were collected from six sites across saline agricultural soils of three provinces in Northeast China. The letter N in the sample name represents North latitude and the number represents the degree of latitude. N40, N42, N44, N45, N46, and N47 represent the latitude degree of each sampling site. The letters A, B, and C suggest that the samples are three replicates sampled from each site.

**Table S2.** The physiochemical properties of soil samples collected from saline soils in Northeast China along a latitude gradient.

| Sample | EC<br>(mS/cm) | Ca <sup>2+</sup><br>(g/kg) | Mg <sup>2+</sup><br>(g/kg) | K <sup>+</sup><br>(g/kg) | Na <sup>+</sup><br>(g/kg) | CO <sub>3</sub> <sup>2-</sup><br>(g/kg) | HCO <sub>3</sub> <sup>-</sup><br>(g/kg) | Cl <sup>-</sup><br>(g/kg) | SO <sub>4</sub> <sup>2-</sup><br>(g/kg) |
|--------|---------------|----------------------------|----------------------------|--------------------------|---------------------------|-----------------------------------------|-----------------------------------------|---------------------------|-----------------------------------------|
| N47A   | 78.9          | 0.43                       | 0.06                       | 0.04                     | 3.5                       | 0.94                                    | 1.44                                    | 1.44                      | 7.63                                    |
| N47B   | 109.2         | 0.46                       | 0.07                       | 0.04                     | 3.86                      | 1.95                                    | 0.75                                    | 1.25                      | 6.67                                    |
| N47C   | 64.1          | 0.4                        | 0.1                        | 0.03                     | 2.04                      | 1.64                                    | 0.98                                    | 0.87                      | 7.58                                    |
| N46A   | 18.59         | 0.31                       | 0.11                       | 0.02                     | 0.61                      | 0                                       | 1.17                                    | 0.22                      | 3.81                                    |
| N46B   | 16.5          | 0.24                       | 0.09                       | 0.02                     | 0.41                      | 0                                       | 1.04                                    | 0.16                      | 2.94                                    |
| N46C   | 15.5          | 0.31                       | 0.04                       | 0.02                     | 0.54                      | 0                                       | 0.74                                    | 0.13                      | 3.28                                    |
| N45A   | 366           | 0.27                       | 0.07                       | 0.03                     | 4.98                      | 0.67                                    | 9.01                                    | 5.38                      | 2.26                                    |
| N45B   | 337           | 0.31                       | 0.07                       | 0.03                     | 4.7                       | 2.41                                    | 8.14                                    | 5.94                      | 2.39                                    |
| N45C   | 335           | 0.33                       | 0.09                       | 0.04                     | 5.72                      | 1.3                                     | 5.42                                    | 5.58                      | 2.29                                    |
| N44A   | 295           | 0.13                       | 0.03                       | 0.03                     | 4.43                      | 1.59                                    | 5.78                                    | 4.73                      | 3.35                                    |
| N44B   | 372           | 0.14                       | 0.02                       | 0.03                     | 4.95                      | 0.75                                    | 6.89                                    | 5.07                      | 2.81                                    |
| N44C   | 390           | 0.19                       | 0.04                       | 0.04                     | 4.47                      | 1.37                                    | 8.13                                    | 2.89                      | 2.71                                    |
| N42A   | 6.9           | 0.2                        | 0.01                       | 0.01                     | 0.1                       | 0                                       | 0.62                                    | 0.32                      | 4.08                                    |
| N42B   | 11.44         | 0.25                       | 0.04                       | 0.03                     | 0.19                      | 0                                       | 0.85                                    | 0.17                      | 3.88                                    |
| N42C   | 8.24          | 0.21                       | 0.03                       | 0.02                     | 0.17                      | 0                                       | 1.12                                    | 0.24                      | 2.32                                    |
| N40A   | 139.4         | 0.09                       | 0.05                       | 0.09                     | 2.13                      | 0                                       | 1.1                                     | 3.3                       | 2.64                                    |
| N40B   | 245           | 0.3                        | 0.23                       | 0.36                     | 3.81                      | 0.17                                    | 1.05                                    | 5.04                      | 2.57                                    |
| N40C   | 137.4         | 0.32                       | 0.08                       | 0.13                     | 2.29                      | 0                                       | 1.01                                    | 3.56                      | 2.68                                    |

**Table S3.** Pearson correlation of bacterial community diversity (Shannon index) and species richness (Chao1 index) with soil factors.

|                               | Chao1      |             | Shannon    |             |
|-------------------------------|------------|-------------|------------|-------------|
|                               | <i>r</i>   | <i>P</i>    | <i>r</i>   | <i>P</i>    |
| pH                            | -0.919586  | 0.000006816 | -0.9016787 | 3.213E-07   |
| EC                            | -0.8356093 | 0.00001579  | -0.8917889 | 6.698E-07   |
| Ca <sup>2+</sup>              | 0.2362864  | 0.3452      | 0.27       | 0.2761      |
| Mg <sup>2+</sup>              | 0.23       | 0.3591      | 0.219      | 0.3829      |
| K <sup>+</sup>                | 0.19       | 0.46        | 0.11       | 0.66        |
| Na <sup>+</sup>               | -0.776     | 0.000152    | -0.84      | 0.00001281  |
| CO <sub>3</sub> <sup>2-</sup> | -0.67      | 0.002448    | -0.63      | 0.005283    |
| HCO <sub>3</sub> <sup>-</sup> | -0.86      | 0.00000539  | -0.88      | 0.000001598 |
| Cl <sup>-</sup>               | -0.65      | 0.003454    | -0.75      | 0.0003483   |
| SO <sub>4</sub> <sup>2-</sup> | 0.23       | 0.3537      | 0.26       | 0.3029      |

**Table S4.** Relationships between different bacterial groups. Pearson correlation between relative abundances of different members was performed. Red color represents negative interactions between the two bacterial taxa, and blue color denotes positive interactions. Significance is indicated by \* $p < 0.05$ , \*\* $p < 0.01$ , \*\*\* $p < 0.001$ , no symbol indicates no significant correlation ( $p > 0.05$ ).

|                        | Gammaproteobacteria | Deltaproteobacteria | Acidimicrobia | Alphaproteobacteria | Bacteroidia | Anaerolineae | Thermoanaerobaculia | Rhodothermia | Nitiliruptoria | Thermodesulfovibrionia | Gemmatimonadetes | Ignavibacteria |
|------------------------|---------------------|---------------------|---------------|---------------------|-------------|--------------|---------------------|--------------|----------------|------------------------|------------------|----------------|
| Gammaproteobacteria    |                     | 0.98***             | -0.14         | -0.11               | 0.068       | 0.29         | 0.74***             | -0.63**      | -0.67**        | 0.67**                 | -0.52*           | 0.66**         |
| Deltaproteobacteria    | 0.98***             |                     | -0.1          | -0.31               | -0.07       | 0.36         | 0.77***             | -0.51*       | -0.54*         | 0.79***                | -0.6**           | 0.7**          |
| Acidimicrobia          | -0.14               | -0.1                |               | -0.44               | -0.62**     | -0.5*        | -0.19               | 0.66**       | 0.58*          | -0.43                  | -0.47**          | -0.57*         |
| Alphaproteobacteria    | -0.11               | -0.31               | -0.44         |                     | 0.61***     | 0.08         | 0.02                | -0.47*       | -0.46          | -0.35                  | 0.55*            | -0.05          |
| Bacteroidia            | 0.068               | -0.07               | -0.62**       | 0.61***             |             | 0.12         | -0.04               | -0.73***     | -0.69**        | -0.11                  | 0.58*            | 0.03           |
| Anaerolineae           | 0.29                | 0.36                | -0.5*         | 0.08                | 0.12        |              | 0.3                 | -0.38        | -0.34          | 0.61**                 | -0.23            | 0.66**         |
| Thermoanaerobaculia    | 0.74***             | 0.77***             | -0.19         | 0.02                | -0.04       | 0.3          |                     | -0.54*       | -0.57*         | 0.67**                 | -0.27            | 0.61**         |
| Rhodothermia           | -0.63**             | -0.51*              | 0.66**        | -0.47*              | -0.73***    | -0.38        | -0.54*              |              | 0.98***        | -0.43                  | -0.24            | -0.56*         |
| Nitiliruptoria         | -0.67**             | -0.54*              | 0.58*         | -0.46               | -0.69**     | -0.34        | -0.57*              | 0.98***      |                | -0.41                  | -0.21            | -0.54*         |
| Thermodesulfovibrionia | 0.67**              | 0.79***             | -0.43         | -0.35               | -0.11       | 0.61**       | 0.67**              | -0.43        | -0.41          |                        | -0.33            | 0.91***        |
| Gemmatimonadetes       | -0.52*              | -0.6**              | -0.47**       | 0.55*               | 0.58*       | -0.23        | -0.27               | -0.24        | -0.21          | -0.33                  |                  | -0.19          |
| Ignavibacteria         | 0.66**              | 0.7**               | -0.57*        | -0.05               | 0.03        | 0.66**       | 0.61**              | -0.56*       | -0.54*         | 0.91***                | -0.19            |                |

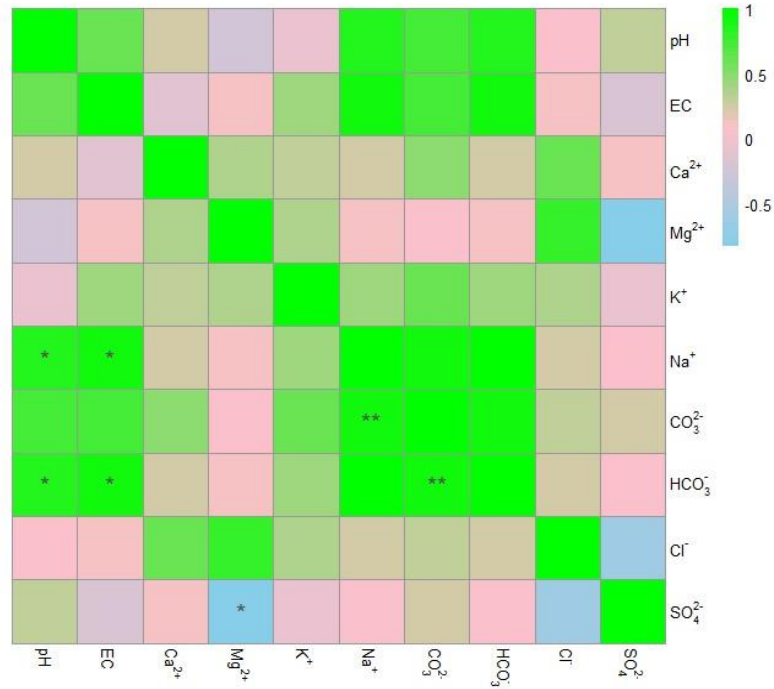

**Figure S1.** Heatmap of the soil physiochemical properties. The asterisks indicate the significant correlation between different soil characteristics as revealed by Spearman's correlation analysis (\*  $P < 0.05$ ; \*\*  $P < 0.01$ ).

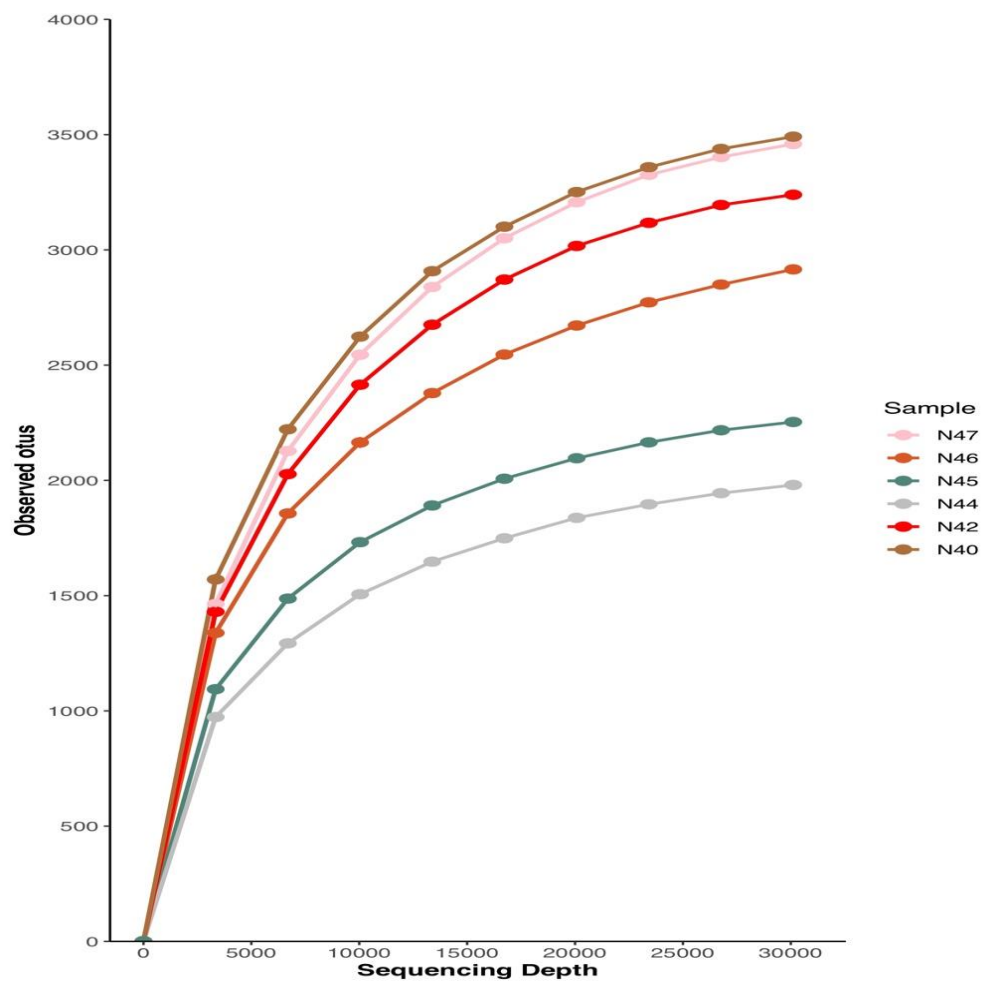

**Figure S2.** Rarefaction curve with maximum read depth. Sufficient sequencing depth was achieved for representative coverage of the bacterial community diversity in each sample.

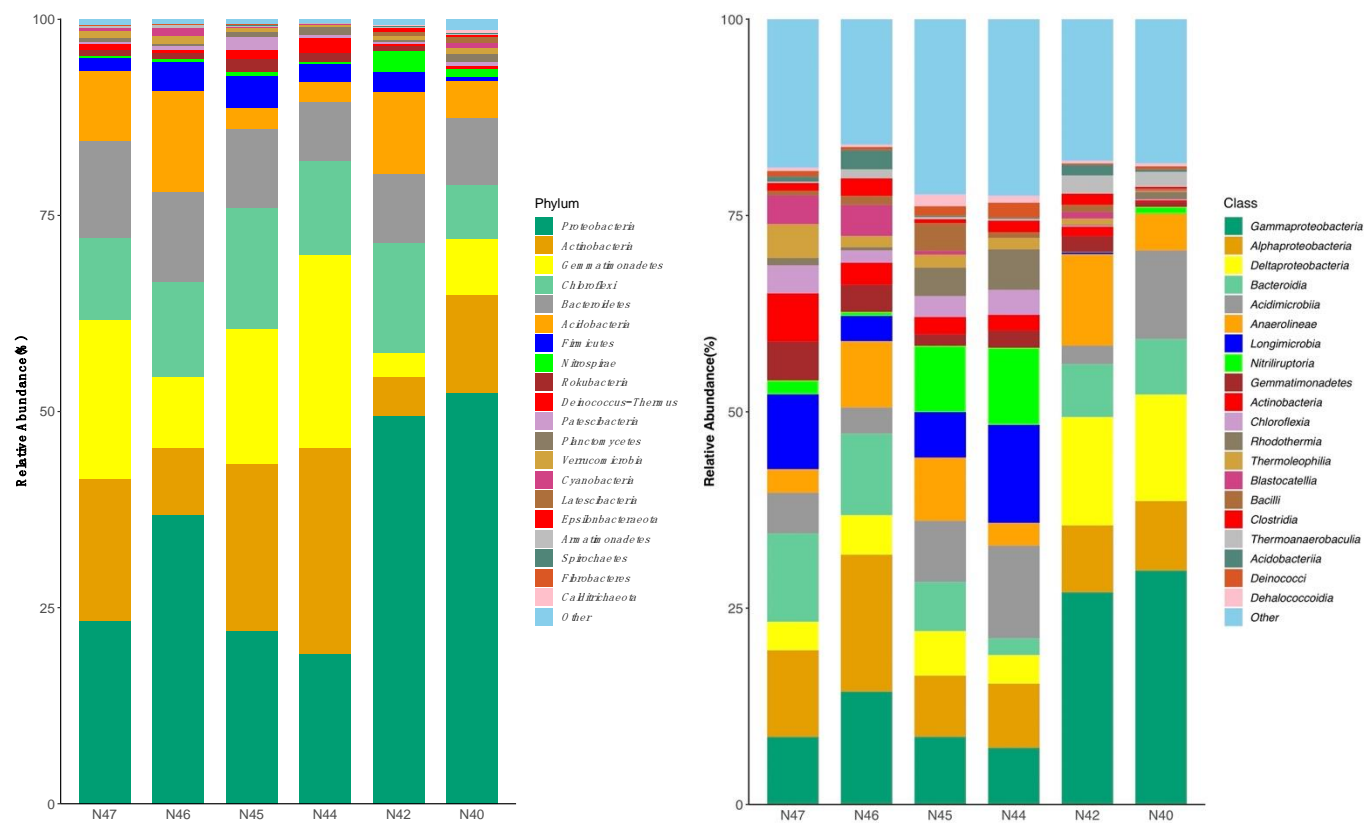

**Figure S3.** The bacterial community composition at phylum and class level.



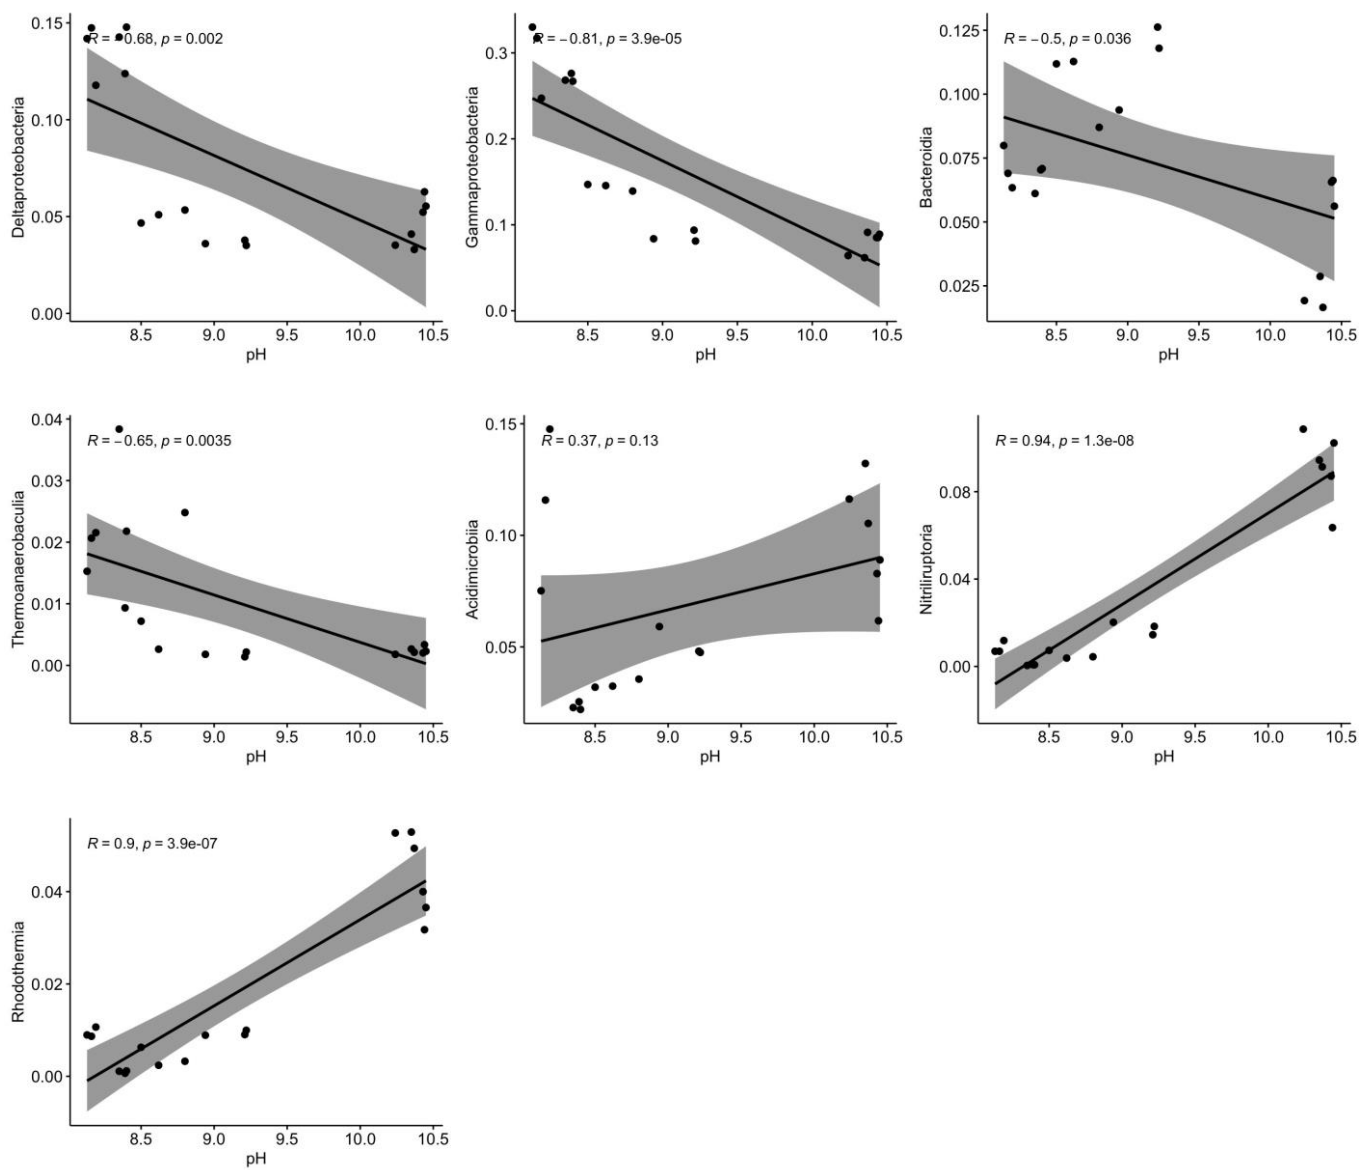

**Figure S4.** Pearson correlation of bacterial taxonomic composition with soil pH.

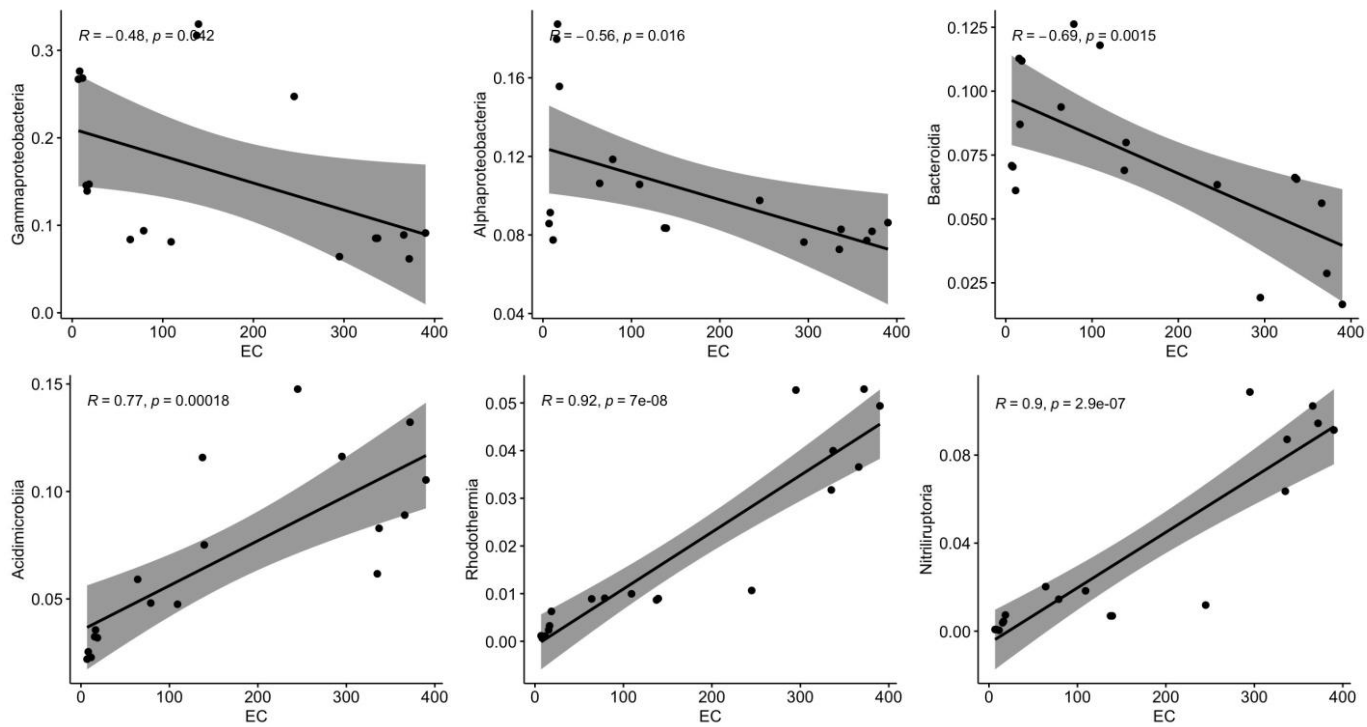

**Figure S5.** Pearson correlation of bacterial taxonomic composition with soil EC.

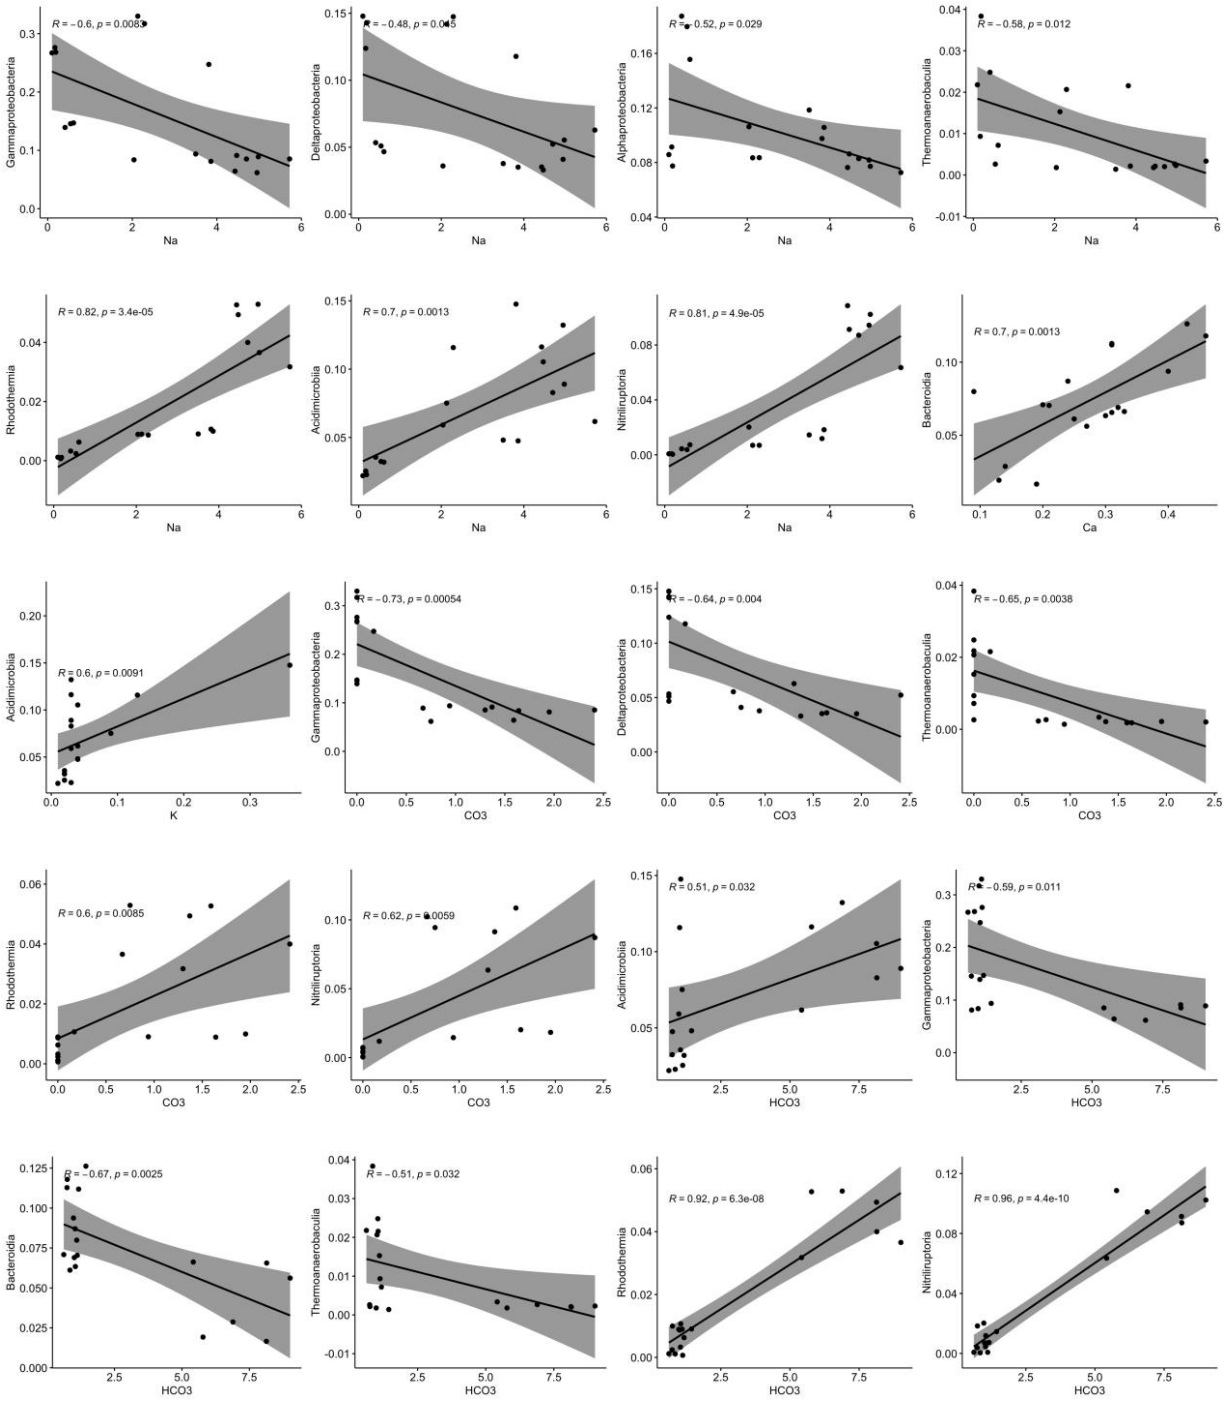

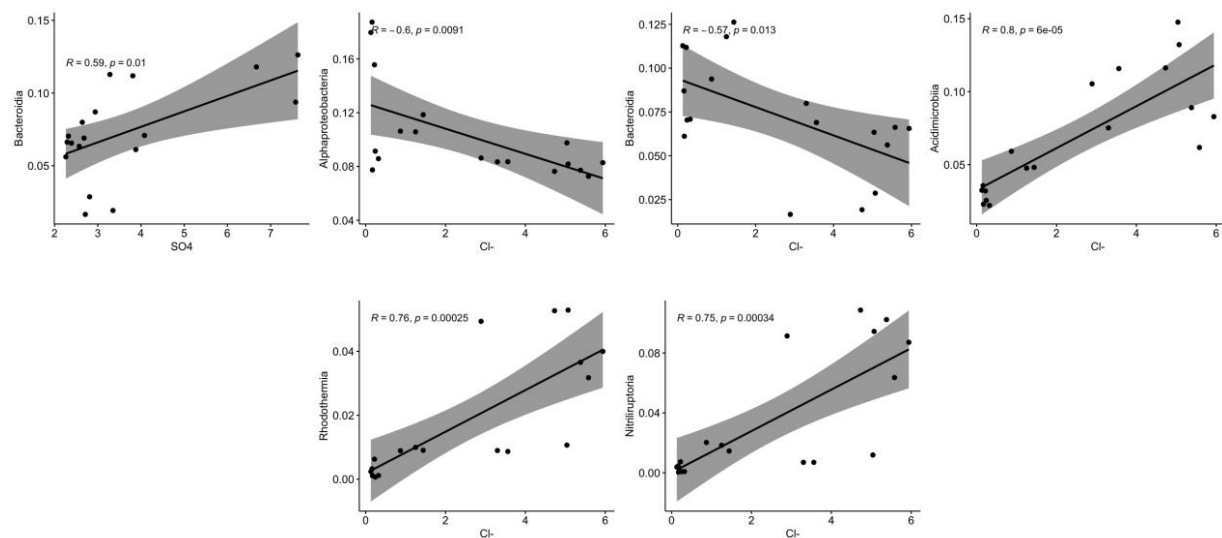

**Figure S6.** Pearson correlation of bacterial taxonomic composition with soil physiochemical factors including the content of Na<sup>+</sup>, K<sup>+</sup>, Ca<sup>2+</sup>, CO<sub>3</sub><sup>2-</sup>, HCO<sub>3</sub><sup>-</sup>, SO<sub>4</sub><sup>2-</sup>, and Cl<sup>-</sup>.
